# Supplementary material for: Controllable growth of Ag2S–CdS heteronanostructures
Source: Royal Society of Chemistry journal article supplement (doi:10.1039/c4ce00694a), 2014-01-01
Supplement: c4ce00694a1.pdf [file c4ce00694a1.pdf]

## Supplementary Information

### Controllable Growth of Ag<sub>2</sub>S-CdS Heteronanostructures

Yejun Zhang, Shuling Shen and Qiangbin Wang\*

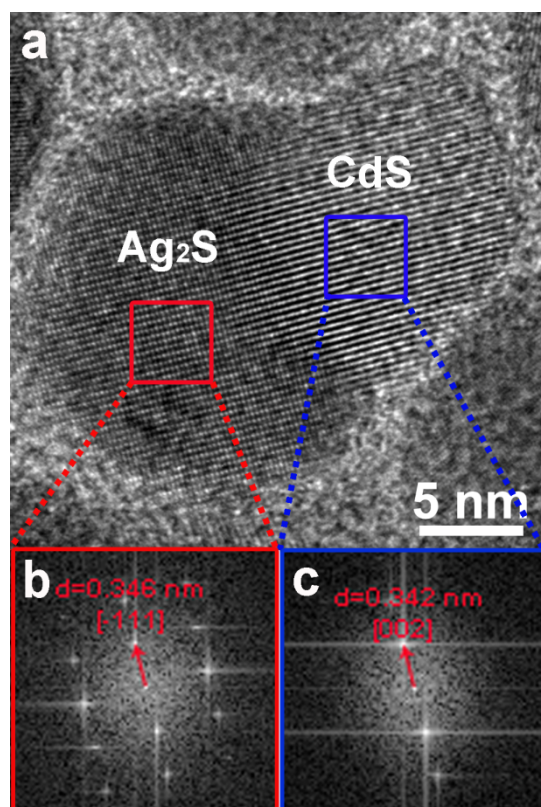

**Figure S1.** (a) HRTEM image of Ag<sub>2</sub>S-CdS HNSs, (b) and (c) corresponding FFT patterns from the selected areas of Ag<sub>2</sub>S and CdS in (a), respectively.

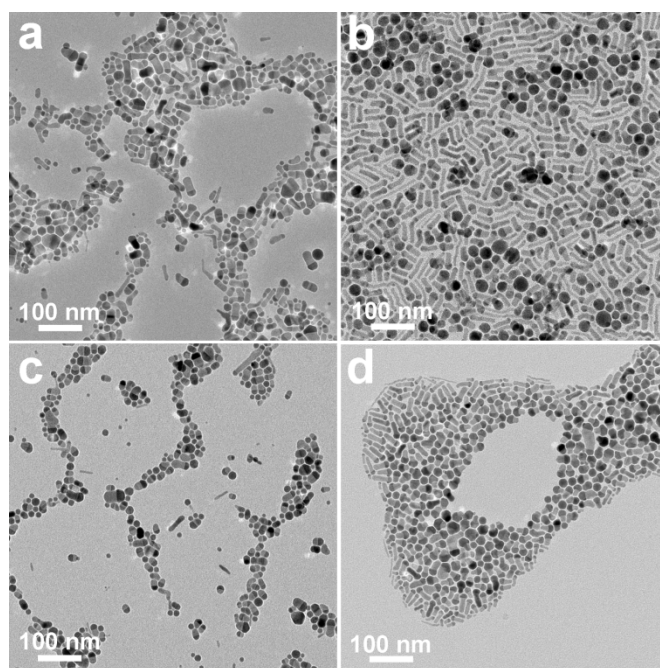

**Figure S2.** TEM images of  $\text{Ag}_2\text{S}$ -CdS HNSs ( $\text{Ag}_2\text{S}/\text{CdS}$  molar ratios: 1/1) at different reaction conditions. (a) 150 °C, 60 min; (b) 190 °C, 60 min; (c) 170 °C, 30 min; (d) 170 °C, 120 min. Irregular  $\text{Ag}_2\text{S}$ -CdS HNSs were obtained under the above reaction conditions. These results suggest that the reaction condition of 170 °C and 60 min is an optimized condition for preparation of uniform  $\text{Ag}_2\text{S}$ -CdS HNSs in this system.

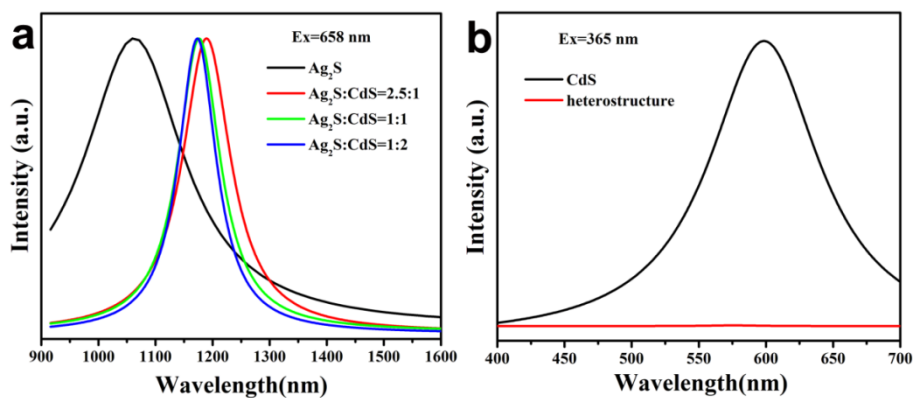

**Figure S3.** (a) Emission spectra of  $\text{Ag}_2\text{S}$  nanocrystals and  $\text{Ag}_2\text{S}$ -CdS HNSs in near-infrared region. (b) Emission spectra of CdS and  $\text{Ag}_2\text{S}$ -CdS HNSs in the visible region.
